# Regulatory mutations in transforming growth factor- $\beta$ 3 gene involved in arrhythmogenic right ventricular cardiomyopathy

## AUTHOR'S RETROSPECTIVE

### Alessandra Rampazzo\*

Department of Biology, University of Padua, Via G. Colombo 3, Padua 35131, Italy

Online publish-ahead-of-print 9 August 2012

This editorial refers to an article by G. Beffagna *et al.*<sup>13</sup> published in *Cardiovascular Research* in 2005 (see **Box 1**). It is accompanied by an editorial by J. Tamargo, pp. 188–190, this issue, as part of this Spotlight on Landmark Papers in *Cardiovascular Research*.

## 1. Introduction

Arrhythmogenic right ventricular cardiomyopathy (ARVC) is an important cause of sudden death in young adults and athletes. This heart muscle disease is characterized by myocardial dystrophy, mostly of the right ventricle, with massive fibro-fatty infiltration accounting for ventricular electrical instability at a risk of severe arrhythmias and even cardiac arrest.<sup>1,2</sup> The left ventricular myocardium seems to be involved in more than half of the cases.<sup>3</sup> The disease is clinically heterogeneous, with inter- and intra-familial variability, ranging from benign to malignant forms with a high risk of sudden cardiac death.<sup>3</sup> The prevalence of the disease in the general population has been estimated to vary from 1 in 1000 to 1 in 5000 individuals,<sup>4,5</sup> and men are more frequently affected than women, with an approximate ratio of 3:1.<sup>6</sup> The disease is familial, and typically autosomal dominant with reduced penetrance in about half the cases, although autosomal recessive forms have been reported as well.<sup>3</sup>

Most of the pathogenic mutations have been identified in genes encoding the desmosomal proteins plakoglobin (JUP), desmoplakin (DSP), plakophilin-2 (PKP2), desmoglein-2 (DSG2), and desmocollin-2 (DSC2).<sup>3</sup> Although rare, mutations in some non-desmosomal proteins, such as cardiac ryanodine receptor type-2, transforming growth factor- $\beta$ 3 (TGF $\beta$ 3), transmembrane protein 43, desmin, titin, and lamin A/C have also been associated with ARVC. Mutations in desmosomal genes have been identified in half of the patients, and a significant proportion of them were found to carry multiple mutations.<sup>7,8</sup>

Therefore, ARVC is actually defined as a disease of desmosomes. Desmosomes are complex cell–cell adhesion structures that

provide mechanical integrity of heart tissue, affording an intercellular connection between adjacent cells. Most recently, Franke *et al.*<sup>9</sup> have shown that at the intercalated disks of mammalian hearts, desmosomal proteins also contribute to the assembly of extended junctions, named *areae compositae*. Some desmosomal proteins, such as plakoglobin, fulfil dual roles as structural proteins in cell–cell adhesion junctions and as nuclear signalling molecules. It has been proposed that mutations in desmosomal proteins implicated in ARVC may perturb the normal balance of plakoglobin in junctions and the cytosol, which, in turn, could promote dysregulated gene expression circumventing the normal controls of Wnt signalling pathways.<sup>10</sup>

## 2. Identification of regulatory mutations in the TGF $\beta$ 3 gene in ARVC patients

In 1994, at the beginning of ARVC genetic studies, our group mapped for the first time the ARVD1 disease gene linked to markers on chromosome 14q42.3 in a large Italian family<sup>4</sup> and later confirmed locus assignment in an additional ARVC family.<sup>11</sup> Since then, the disease gene has been elusive. The critical interval for ARVD1 contained 40 known genes; 5 of them (*POMT2*, *KIAA0759*, *KIAA1036*, *C14orf4*, and *TAIL1*) were unsuccessfully screened for pathogenic ARVC mutations.<sup>11</sup> Among genes mapped to ARVD1 critical region and expressed in myocardium, TGF $\beta$ 3 appeared a very good candidate, as it encodes a cytokine that stimulates fibrosis and modulates cell adhesion.<sup>12</sup> At that time, only mutations in *RYR2*, *JUP*, *DSP*, and *PKP2* genes have been associated with ARVC.

After previous analyses failed to detect any mutation in the coding region of the TGF $\beta$ 3 gene, mutation screening was extended to the promoter and untranslated regions (UTRs). A nucleotide substitution (c.-36G>A) in 5'UTR of the TGF $\beta$ 3 gene was detected in all affected subjects belonging to a large ARVD1 family<sup>13</sup> for which linkage

# Regulatory mutations in transforming growth factor- $\beta$ 3 gene cause arrhythmogenic right ventricular cardiomyopathy type 1

Giorgia Beffagna<sup>a,1</sup>, Gianluca Occhi<sup>a,1</sup>, Andrea Nava<sup>b</sup>, Libero Vitiello<sup>a</sup>, Andrea Ditadi<sup>a</sup>, Cristina Basso<sup>c</sup>, Barbara Bauce<sup>b</sup>, Gianni Carraro<sup>d</sup>, Gaetano Thiene<sup>c</sup>, Jeffrey A. Towbin<sup>e</sup>, Gian Antonio Danieli<sup>a</sup>, Alessandra Rampazzo<sup>a,\*</sup>

<sup>a</sup>Department of Biology, University of Padua, Via Ugo Bassi 58/B 35131 Padua, Italy

<sup>b</sup>Department of Cardiology, University of Padua, 35131 Padua, Italy

<sup>c</sup>Institute of Pathology, University of Padua, 35131 Padua, Italy

<sup>d</sup>Department of Human Anatomy, University of Padua, 35131 Padua, Italy

<sup>e</sup>Department of Pediatrics, Section of Cardiology, Baylor College of Medicine, Houston, USA

Received 3 August 2004; received in revised form 29 September 2004; accepted 5 October 2004

Time for primary review 12 days

## Abstract

**Objective:** Arrhythmogenic right ventricular cardiomyopathy (ARVC) is a genetically heterogeneous disorder characterized by fibro-fatty replacement of the right ventricular myocardium, associated with high risk of sudden death. The objective of this study is to identify the gene involved in ARVD1, which has been elusive ever since its locus was mapped to chromosome 14q24.3.

**Methods and results:** Mutation screening of the promoter and untranslated regions (UTRs) of the transforming growth factor-beta3 (TGF $\beta$ 3) gene was performed by direct sequencing of genomic DNA of one index case belonging to an ARVD1 family including 38 members in four generations. We detected a nucleotide substitution (c.-36G>A) in 5' UTR of TGF $\beta$ 3 gene, invariably associated with the typical ARVC clinical phenotype in the affected family members, according to the established diagnostic criteria. Investigation extended to 30 unrelated ARVC patients, performed by denaturing high-performance liquid chromatography (DHPLC), led to the identification of an additional mutation (c.1723C>T) in the 3' UTR of one proband. Neither nucleotide change was found in 300 control subjects. In vitro expression assays with constructs containing the mutations showed that mutated UTRs were twofold more active than wild-types.

**Conclusion:** We identified TGF $\beta$ 3 as the disease gene involved in ARVD1. The identification of a novel ARVC gene will increase the power of the genetic screening for early diagnosis of asymptomatic carriers among relatives of ARVC patients.

© 2004 European Society of Cardiology. Published by Elsevier B.V. All rights reserved.

**Keywords:** Gene expression; Cardiomyopathy; Sudden death; Ventricular arrhythmias

**Box 1** Title page including abstract from the original 2005 publication in *Cardiovascular Research*.<sup>13</sup> Used with permission of Oxford University Press on behalf of the European Society of Cardiology.

data demonstrated that ARVC was transmitted linked to 14q24.3 ( $z = 4.41$  at  $\theta = 0$  for marker D14S254). The mutation was found in all nine affected members of the kindred, and was also present in three asymptomatic relatives, in line with the incomplete penetrance of the disease (Figure 1).

The 5' UTR of the TGF $\beta$ 3 mRNA is 1.1 kb long and contains 11 ATG codons, which mark the beginning of 11 potential upstream open reading frames. The ATG at position -142 opens a reading frame encoding a putative 88 amino acid (aa)-long peptide overlapping the sequence of the TGF $\beta$ 3 first exon.<sup>14</sup> The G→A transition in the 5' UTR region would lead to an Arg→His substitution (R36H) at codon 36 of the 88-aa peptide. It was demonstrated that mutations in the two ATGs closest to the TGF $\beta$ 3 starting codon cause a significant increase in translation efficiency,<sup>14</sup> thus suggesting that these short peptides might play an inhibitory effect.

The mutation screening of the TGF $\beta$ 3 promoter and UTRs was then extended to 30 unrelated ARVC index patients, and an additional

mutation (c.1723C>T) was identified in the 3' UTR of one proband showing a typical ARVC clinical phenotype.<sup>13</sup>

Neither of the nucleotide changes were detected in 600 chromosomes from the same population. Moreover, these variants are actually absent from dbSNP (<http://www.ncbi.nlm.nih.gov/projects/SNP/>) and from the Exome Variant Server (<http://evs.gs.washington.edu/EVS/>).

Functional studies revealed that both mutations significantly increase the activity of the luciferase reporter gene (more than two-fold,  $P < 0.01$ ) in C2C12 cells, which have been already used as an *in vitro* model in TGF $\beta$ 3 expression studies. However, confirmation of *in vivo* overexpression of TGF $\beta$ 3 in the mutation carriers was not available due to the lack of cardiac biopsy samples from affected patients.

Affected subjects belonging to two additional and unrelated families, in which linkage with ARVD1 was previously suspected, showed no mutations in TGF $\beta$ 3 coding sequences, UTRs, and

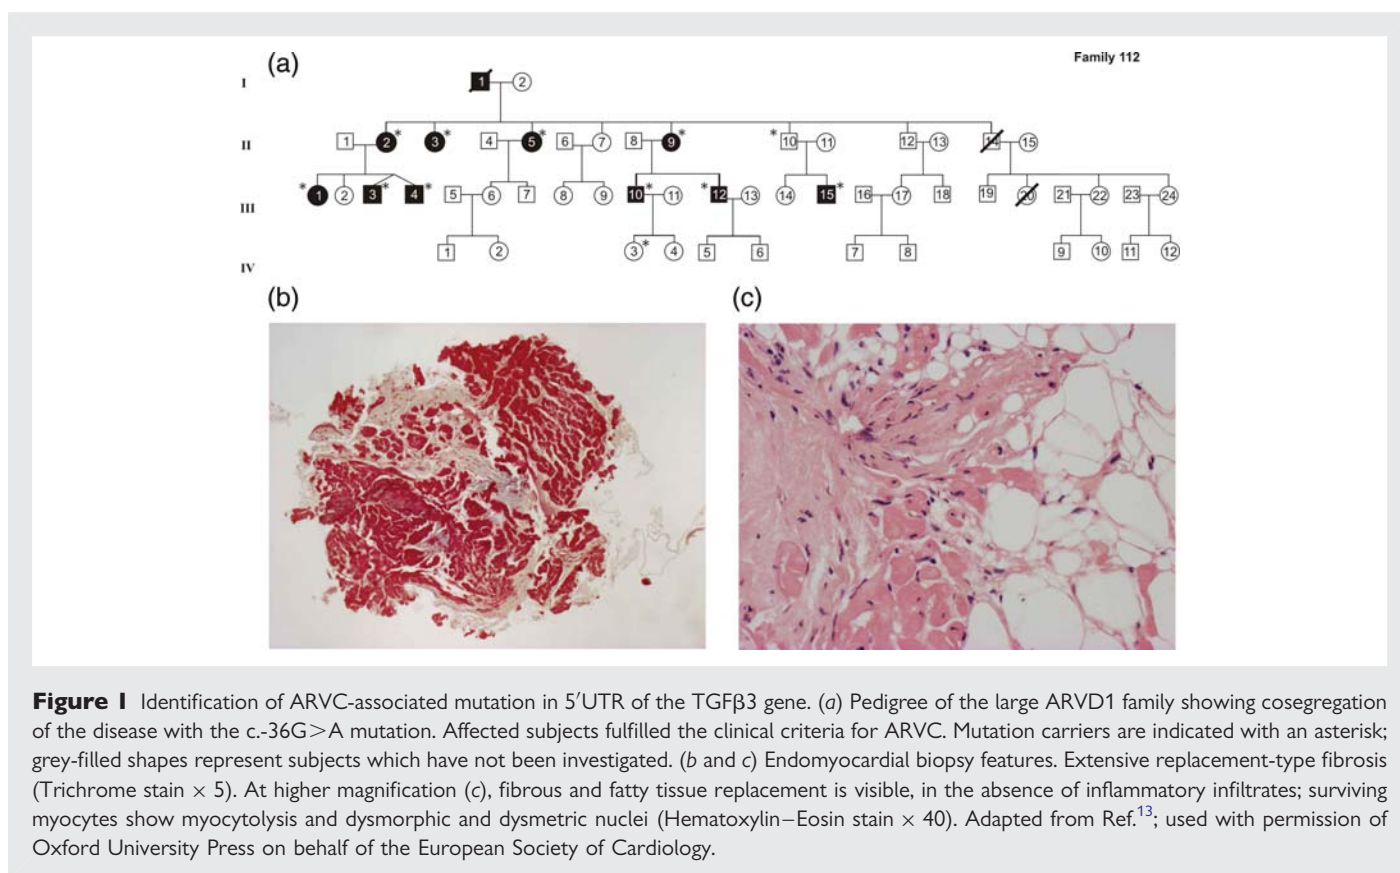

**Figure 1** Identification of ARVC-associated mutation in 5'UTR of the *TGFβ3* gene. (a) Pedigree of the large ARVD1 family showing cosegregation of the disease with the c.-36G>A mutation. Affected subjects fulfilled the clinical criteria for ARVC. Mutation carriers are indicated with an asterisk; grey-filled shapes represent subjects which have not been investigated. (b and c) Endomyocardial biopsy features. Extensive replacement-type fibrosis (Trichrome stain  $\times 5$ ). At higher magnification (c), fibrous and fatty tissue replacement is visible, in the absence of inflammatory infiltrates; surviving myocytes show myocytolysis and dysmorphic and dysmetric nuclei (Hematoxylin–Eosin stain  $\times 40$ ). Adapted from Ref.<sup>13</sup>; used with permission of Oxford University Press on behalf of the European Society of Cardiology.

promoter region. Most recently, in one of these two families, a large deletion encompassing the entire *PKP2* gene was identified (Li Mura, Rampazzo, unpublished data).

### 3. Role of *TGFβ3* in the pathogenesis of ARVC

*TGFβ3* is a member of the transforming growth factor family. The *TGFβ* superfamily consists of pleiotropic and multifunctional peptides that exert diverse effects on different cell types; they have the ability to regulate numerous biological processes, including cell differentiation and proliferation, apoptosis, fibrous tissue deposition, and tissue remodelling during disease pathogenesis and cancer.<sup>12</sup>

Three structurally similar isoforms of *TGFβ* (*TGFβ1*, 2, and 3), encoded by three distinct genes, have been identified in mammalian species. They are produced in latent forms, and upon activation they usually interact with *TGFβR1* and *TGFβR2* receptors and induce phosphorylation of *SMAD2* or *SMAD3*. These *SMADs* associate with *SMAD4* and translocate to the nucleus, where they recruit coactivators or corepressors into transcriptional complexes and regulate transcription of target genes. The inhibitory *SMAD6* and *SMAD7* negatively regulate this canonical *TGFβ* signalling. *TGFβ* signalling also occurs through *SMAD*-independent pathways.<sup>15</sup>

*Tgfβ3* is expressed in several tissues during mouse embryonic development, including heart, lung, skin, and craniofacial structures. *Tgfβ3*-deficient animals exhibit defective epithelial–mesenchymal interactions resulting in cleft palate and abnormal lung development, and they die soon after birth,<sup>16</sup> precluding any further determination of the *Tgfβ3* function in adult mice. On the other hand, *Tgfβ3*

conditional knockout mice die at birth from the same cleft palate defect as knockout mice,<sup>17</sup> indicating that the conditional and knockout alleles are functionally equivalent.

Genetic polymorphisms were found in *TGFβ3* in patients with hypertension<sup>18</sup> and ossification of the posterior longitudinal ligament of the spine (OPLL).<sup>19</sup> No additional mutations associated with inherited diseases have been found thus far in the *TGFβ3* gene.

Finding *TGFβ3* mutations associated with ARVC was very interesting, as it is well established that *TGFβs* stimulate mesenchymal cells to proliferate and to produce extracellular matrix components.<sup>12</sup> In addition, *TGFβ* is a potent regulator of extracellular matrix deposition that suppresses the activity of matrix metalloproteinases and induces the expression of protease inhibitors, including *TIMPs* and *PAI-1*.<sup>20</sup> Moreover, *TGFβ* is able to stimulate the synthesis of connective tissue growth factor, a potent profibrotic mediator that promotes persistent fibrosis.<sup>12</sup> *TGFβ*-mediated effects on fibrous tissue deposition and myocardial hypertrophy have been supported by *TGFβ* overexpression in transgenic mice. *TGFβ1*-overexpressing mice showed significant cardiac hypertrophy which is characterized by interstitial fibrosis and hypertrophic growth of cardiomyocytes.<sup>21</sup> The mutations in UTRs of the *TGFβ3* gene in ARVC patients, which increases expression *in vitro*, could promote myocardial fibrosis *in vivo*. Endomyocardial biopsy in the two probands shows extensive replacement-type fibrosis (Figure 1), in agreement with this hypothesis.<sup>13</sup>

The identification of the genetic basis of ARVC in the past decade provided the opportunity to elucidate the pathogenesis of the disease, allowing the development of several transgenic mouse models recapitulating the ARVC phenotype. Most recently, a cardiomyocyte-restricted *Jup* knockout mouse was generated and characterized.<sup>22</sup>



Jup was specifically deleted in cardiomyocytes by using Cre/loxP technology. Jup mutant mice largely mimic clinical aspects of ARVC, including cardiac dysfunction, myocyte dropout, ventricular dilation and aneurysm, cardiac fibrosis, and spontaneous ventricular arrhythmias. Massive cell death due to apoptosis and necrosis contribute to the cardiomyocyte dropout in Jup mutant hearts. In contrast with recent mouse studies, in this Jup mutant model, the Wnt/ $\beta$ -catenin-mediated signalling was not altered. Interestingly, TGF $\beta$ -mediated signalling, whose contribution to cell death has been well documented,<sup>23</sup> was found to be significantly elevated in Jup mutant cardiomyocytes at the early stage of cardiomyopathy. Phospho-Smad2 was increased in Jup mutant hearts as well as TGF $\beta$ 1 (TGF $\beta$ -induced) and Pai1 (plasminogen activator inhibitor type 1), *bona fide* TGF $\beta$ -signalling downstream effector molecules.<sup>20</sup> These findings suggest that the elevated TGF $\beta$  signalling is associated with the pathogenesis of Jup-related ARVC.

## 4. Conclusions and future perspectives

ARVC is characterized by extensive fibro-fatty replacement of the right ventricular myocardium. Approximately 40% of ARVC patients have one or more mutations in genes encoding desmosomal proteins. However, non-desmosomal protein genes have been implicated in ARVC as well. Two regulatory mutations in the TGF $\beta$ 3 gene causing its overexpression *in vitro* have been identified in two patients showing a typical ARVC phenotype. Although TGF $\beta$ 3 gene mutations seem to be extremely rare among ARVC patients, these interesting findings have potentially major significance for our understanding of the molecular pathogenesis of ARVC and of the function of TGF $\beta$ 3. Moreover, it has been recently reported that the up-regulation of TGF $\beta$  signalling is likely to be associated with the pathogenesis of Jup-related ARVC. The next logical step would be to investigate whether the inhibition of TGF $\beta$  signalling can delay or prevent the right ventricular disease from becoming manifest in ARVC animal models.

## References

1. Thiene G, Nava A, Corrado D, Rossi L, Pennelli N. Right ventricular cardiomyopathy and sudden death in young people. *N Engl J Med* 1988;**318**:129–133.
2. Nava A, Thiene G, Canciani B, Scognamiglio R, Daliento L, Buja G *et al*. Familial occurrence of right ventricular dysplasia: a study involving nine families. *J Am Coll Cardiol* 1988;**12**:1222–1228.
3. Basso C, Corrado D, Marcus FI, Nava A, Thiene G. Arrhythmogenic right ventricular cardiomyopathy. *Lancet* 2009;**373**:1289–1300.
4. Rampazzo A, Nava A, Danieli GA, Buja G, Daliento L, Fasoli G *et al*. The gene for arrhythmogenic right ventricular cardiomyopathy maps to chromosome 14q23-q24. *Hum Mol Genet* 1994;**3**:959–962.
5. Corrado D, Basso C, Pavei A, Michieli P, Schiavon M, Thiene G. Trends in sudden cardiovascular death in young competitive athletes after implementation of a preparticipation screening program. *JAMA* 2006;**296**:1593–1601.
6. Bauce B, Frigo G, Marcus FI, Basso C, Rampazzo A, Maddalena F *et al*. Comparison of clinical features of arrhythmogenic right ventricular cardiomyopathy in men versus women. *Am J Cardiol* 2008;**102**:1252–1257.
7. Bauce B, Nava A, Beffagna G, Basso C, Lorenzon A, Smaniotto G *et al*. Multiple mutations in desmosomal proteins encoding genes in arrhythmogenic right ventricular cardiomyopathy/ dysplasia. *Heart Rhythm* 2010;**7**:22–29.
8. Xu T, Yang Z, Vatta M, Rampazzo A, Beffagna G, Pilichou K *et al*. Compound and digenic heterozygosity contributes to arrhythmogenic right ventricular cardiomyopathy. *J Am Coll Cardiol* 2010;**55**:587–597.
9. Franke WW, Borrmann CM, Grund C, Pieperhoff S. The area composita of adhering junctions connecting heart muscle cells of vertebrates. I. Molecular definition in intercalated disks of cardiomyocytes by immunoelectron microscopy of desmosomal proteins. *Eur J Cell Biol* 2006;**85**:69–82.
10. Garcia-Gras E, Lombardi R, Giocondo MJ, Willerson JT, Schneider MD, Khoury DS *et al*. Suppression of canonical Wnt/ $\beta$ -catenin signaling by nuclear plakoglobin recapitulates phenotype of arrhythmogenic right ventricular cardiomyopathy. *J Clin Invest* 2006;**116**:2012–2021.
11. Rampazzo A, Beffagna G, Nava A, Occhi G, Bauce B, Noiato M *et al*. Arrhythmogenic right ventricular cardiomyopathy type 1 (ARVD1): confirmation of locus assignment and mutation screening of four candidate genes. *Eur J Hum Genet* 2003;**11**:69–76.
12. Mauviel A. Transforming growth factor-beta: a key mediator of fibrosis. *Methods Mol Med* 2005;**117**:69–80.
13. Beffagna G, Occhi G, Nava A, Vitiello L, Ditadi A, Basso C *et al*. Regulatory mutations in transforming growth factor-beta3 gene cause arrhythmogenic right ventricular cardiomyopathy type 1. *Cardiovasc Res* 2005;**65**:366–373.
14. Arrick BA, Lee AL, Grendell RL, Derynck R. Inhibition of translation of transforming growth factor-beta 3 mRNA by its 5' untranslated region. *Mol Cell Biol* 1991;**11**:4306–4313.
15. Dobaczewski M, Chen W, Frangogiannis NG. Transforming growth factor (TGF)- $\beta$  signaling in cardiac remodeling. *J Mol Cell Cardiol* 2011;**51**:600–606.
16. Proetzel G, Pawlowski SA, Wiles MV, Yin M, Boivin GP, Howles PN *et al*. Transforming growth factor-beta 3 is required for secondary palate fusion. *Nat Genet* 1995;**11**:409–414.
17. Doetschman T, Georgieva T, Li H, Reed TD, Grisham C, Friel J *et al*. Generation of mice with a conditional allele for the transforming growth factor beta3 gene. *Genesis* 2012;**50**:59–66.
18. Hu BC, Li L, Sun RH, Gao PJ, Zhu DL, Wang JG *et al*. The association between transforming growth factor beta3 polymorphisms and left ventricular structure in hypertensive subjects. *Clin Chim Acta* 2010;**411**:558–562.
19. Horikoshi T, Maeda K, Kawaguchi Y, Chiba K, Mori K, Koshizuka Y *et al*. A large-scale genetic association study of ossification of the posterior longitudinal ligament of the spine. *Hum Genet* 2006;**119**:611–616.
20. Schiller M, Javelaud D, Mauviel A. TGF-beta-induced SMAD signaling and gene regulation: consequences for extracellular matrix remodeling and wound healing. *J Dermatol Sci* 2004;**35**:83–92.
21. Rosenkranz S, Flesch M, Amann K, Haeuseler C, Kilter H, Seeland U *et al*. Alterations of beta-adrenergic signaling and cardiac hypertrophy in transgenic mice overexpressing TGF-beta(1). *Am J Physiol, Heart Circ Physiol* 2002;**283**:H1253–H1262.
22. Li D, Liu Y, Maruyama M, Zhu W, Chen H, Zhang W *et al*. Restrictive loss of plakoglobin in cardiomyocytes leads to arrhythmogenic cardiomyopathy. *Hum Mol Genet* 2011;**20**:4582–4596.
23. Heldin CH, Landstrom M, Moustakas A. Mechanism of TGF-beta signaling to growth arrest, apoptosis, and epithelial-mesenchymal transition. *Curr Opin Cell Biol* 2009;**21**:166–176.
